# Supplementary material
Source: PubMed Central journal article supplement (PMC2724070)
Supplement: NIHMS111745-supplement-1_si_001.pdf [file NIHMS111745-supplement-1_si_001.pdf]

**Supporting Information** for Murray and Tamm: Clustering of Syntaxin-1A in Model Membranes

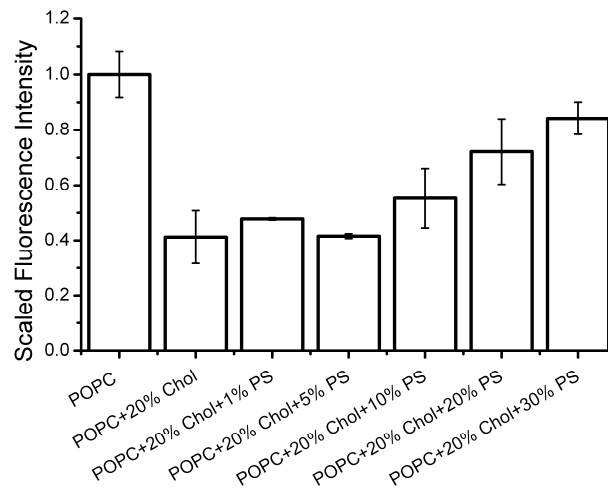

Figure S1. Scaled fluorescence intensities of Alexa647-labeled syntaxin-1A in lipid bilayers of different compositions. The fluorescence intensity in POPC:CHOL (4:1) is self-quenched as in Figure 1. Various additions of POPS relieve this self-quenching progressively as POPS is increased. All intensities are scaled to the syntaxin in POPC only fluorescence. The means and standard deviations from at least three independent reconstitutions for each condition are shown.
